# Supplementary material for: The dentary ofAustralovenator wintonensis(Theropoda, Megaraptoridae); implications for megaraptorid dentition
Source: PeerJ journal article supplement (doi:10.7717/peerj.1512), 2015-12-15

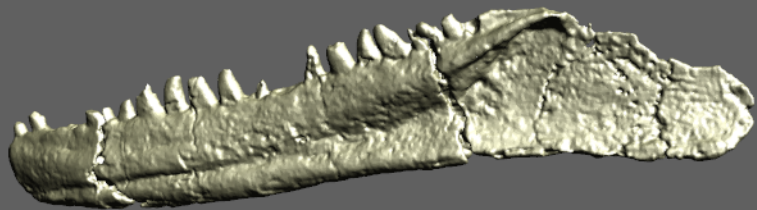

Supplement: Australovenator.pdf [file Australovenator.pdf]
